# Supplementary material
Source: Springer Nature journal article supplement (https://www.springermedizin.de/resource/supplementary/12990_2010_357_MOESM1_ESM.PDF/9613106)
Supplement: MOESM1 [file 9613106]

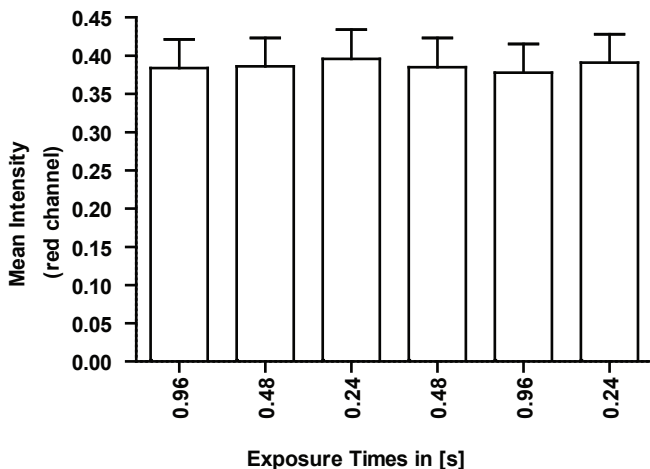

The DRG-culture was imaged with 0.96 s six times until the fluorescence signal was not decreasing anymore. Then the culture was imaged with different usually used exposure times (between 0.24 s and 0.96 s) in a different sequence. The mean intensities + standard deviations of 10 single cells, identified by their position on the slide, were compared to observe any exposure time dependent intensity differences. There was no significant difference of signal intensities in dependence of different exposure times.

Intensity values: 0.96 s:  $0.384 \pm 0.118$ ; 0.48 s:  $0.386 \pm 0.118$ ; 0.24 s:  $0.396 \pm 0.120$ ; 0.48 s:  $0.385 \pm 0.120$ ; 0.96 s:  $0.378 \pm 0.118$ ; 0.24 s:  $0.391 \pm 0.117$ ;
